# Supplementary material for: Principal component analysis to enhance enantioselective Raman spectroscopy
Source: Royal Society of Chemistry journal article supplement (doi:10.1039/c8an01886c), 2019-01-01
Supplement: c8an01886c1.pdf [file c8an01886c1.pdf]

Supplementary Information

**Principal Component Analysis to Enhance Enantioselective Raman Spectroscopy**

Claudia C. Rullich<sup>1</sup> and Johannes Kiefer<sup>1,2\*</sup>

<sup>1</sup>Technische Thermodynamik, Universität Bremen, Badgasteiner Str. 1, 28359 Bremen,  
Germany.

<sup>2</sup>MAPEX Center for Materials and Processes, Bibliothekstr.1, Universität Bremen, 28359  
Bremen, Germany.

\*Corresponding author. Phone: +49 421 218 64777. Email: [jkiefer@uni-bremen.de](mailto:jkiefer@uni-bremen.de)

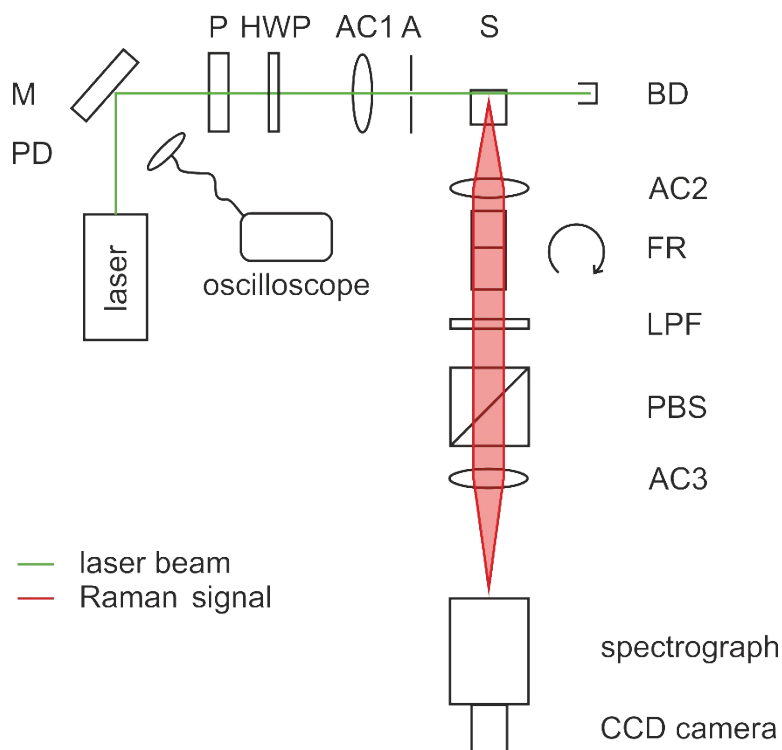

**Fig. S1: Schematic of 90° enantioselective Raman set-up. A: aperture, AC: achromatic lens, BD: beam dump, FR: half-wave Fresnel rhomb, HWP: half-wave plate, LPF: longpass filter, M: mirror, P: polarizer, PD: photo diode, S: sample.**

**Tab. S1 Peak assignment for Raman and ATR-FTIR spectra of 4-methylpentan-2-ol: str.=stretching, def.=deformation, sciss.=scissoring, rock.=rocking, wagg.=wagging, tors.=torsion, s=symmetric, as=antisymmetric, sh=shoulder, FR=Fermi resonance.**

| Raman wavenumber /cm <sup>-1</sup> | FTIR wavenumber /cm <sup>-1</sup> | own assignment                               | Reference |
|------------------------------------|-----------------------------------|----------------------------------------------|-----------|
| 338                                |                                   | CCC def.                                     | 1         |
| 353(sh)                            |                                   | CCO def., CCC def.                           | 1         |
| 386                                |                                   | CCC def.                                     | 1         |
| 428                                |                                   | CCO def., CCC def.                           | 1         |
| 442                                |                                   | CCO def., CCC def.                           | 1         |
| 462                                |                                   | CCO def., CCC def.                           | 1         |
| 489                                |                                   | CCO def., CCC def.                           | 1         |
| 518                                |                                   | CCO def., CCC def.                           | 1         |
| 780                                |                                   | CH <sub>2</sub> rock.                        | 1         |
| 818 (sh)                           |                                   | CC str.                                      | 1         |
| 826                                | 826                               | (C) <sub>2</sub> CO s str.                   | 2         |
| 844 (sh)                           | 846 (sh)                          | CH <sub>2</sub> rock., CH <sub>3</sub> rock. | 1         |
| 878                                | 880                               | CC str.                                      | 1         |

|           |           |                                                                      |        |
|-----------|-----------|----------------------------------------------------------------------|--------|
| 921       | 924       | CC str., CH <sub>3</sub> rock.                                       | 1      |
| 951       |           | CC str., CH <sub>3</sub> rock., CO str.                              | 1      |
| 963       |           | CC str., CH <sub>3</sub> rock., CO str.                              | 1      |
|           | 972       | CO str., CC str.                                                     | 1      |
| 1012      | 1017      | CO str., CH <sub>2</sub> tors.                                       | 1      |
| 1039 (sh) |           | CO str., CH <sub>2</sub> tors.                                       | 1      |
| 1049      |           | CC str.                                                              | 1      |
|           | 1056      | CO str., CC str.                                                     | 1      |
| 1107 (sh) |           | CH <sub>3</sub> rock.                                                | 1      |
|           | 1115      | CH <sub>2</sub> rock.                                                | 1      |
| 1126 (sh) |           | CH <sub>2</sub> rock.                                                | 1      |
|           |           | (C) <sub>2</sub> CO as str.                                          | 2      |
| 1142      | 1140 (sh) | (C) <sub>2</sub> CO as str.                                          | 2      |
| 1157 (sh) | 1154      | (C) <sub>2</sub> CO as str.                                          | 2      |
|           | 1169      | (C) <sub>2</sub> CO as str.                                          | 2      |
| 1224      |           | CH <sub>2</sub> rock., CH <sub>3</sub> rock.                         | 1      |
|           | 1234      | CH <sub>2</sub> rock., CH <sub>3</sub> rock.                         | 1      |
|           | 1275      | CH <sub>2</sub> wagg., COH def.                                      | 1      |
| 1308 (sh) | 1312      | COH def.                                                             | 1      |
| 1325      |           | CH <sub>3</sub> s def.                                               | 3      |
|           | 1332      | CH <sub>3</sub> s def.                                               | 3      |
|           | 1345      | CH <sub>3</sub> s def.                                               | 3      |
|           | 1370      | CH <sub>3</sub> s sciss.<br>CH(CH <sub>3</sub> ) <sub>2</sub> sciss. | 2<br>2 |
|           | 1383 (sh) | CH(CH <sub>3</sub> ) <sub>2</sub> sciss.                             | 2      |
|           | 1413      | CH <sub>2</sub> sciss.                                               | 1      |
|           | 1425 (sh) | CH <sub>2</sub> sciss.                                               | 1      |
| 1433      |           | CH <sub>2</sub> sciss.                                               |        |
| 1441      |           | CH <sub>3</sub> as def.<br>CH <sub>3</sub> as sciss.                 | 3<br>2 |
|           | 1459 (sh) | CH <sub>3</sub> as sciss.                                            | 2      |
|           | 1469      | CH <sub>3</sub> as def.                                              | 1      |
| 2713      |           | Combination                                                          | 1      |
|           | 2724      | Combination                                                          | 1      |
| 2756      |           | Combination                                                          | 1      |
|           | 2841 (sh) | Overtone                                                             | 1      |
| 2875      | 2874      | CH <sub>2</sub> s str                                                | 1, 2   |
| 2894      |           | CH <sub>2</sub> s str., FR                                           | 2      |
| 2908 (sh) |           | CH <sub>2</sub> s str.                                               | 1      |
|           | 2920      | CH <sub>2</sub> FR                                                   | 2      |
| 2931      | 2931 (sh) | CH <sub>3</sub> s str                                                | 1      |
| 2964      | 2960      | CH <sub>2</sub> as str.                                              | 1      |
| 3360      | 3344      | OH str.                                                              | 1      |

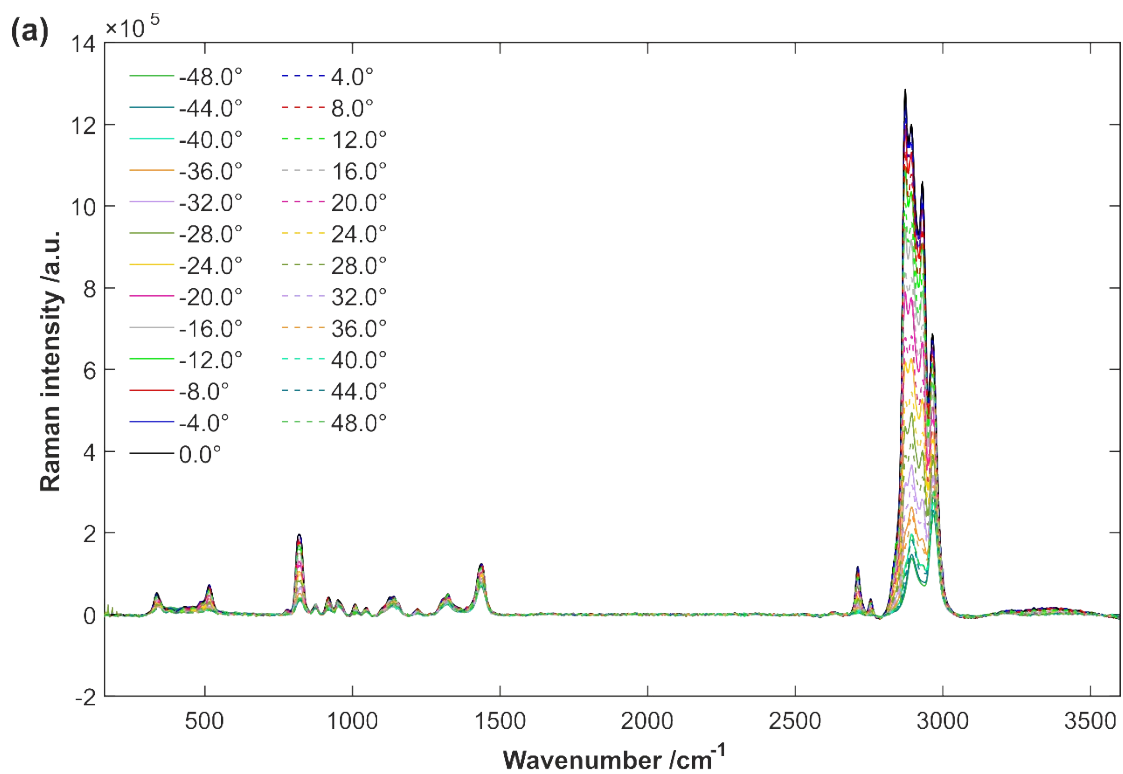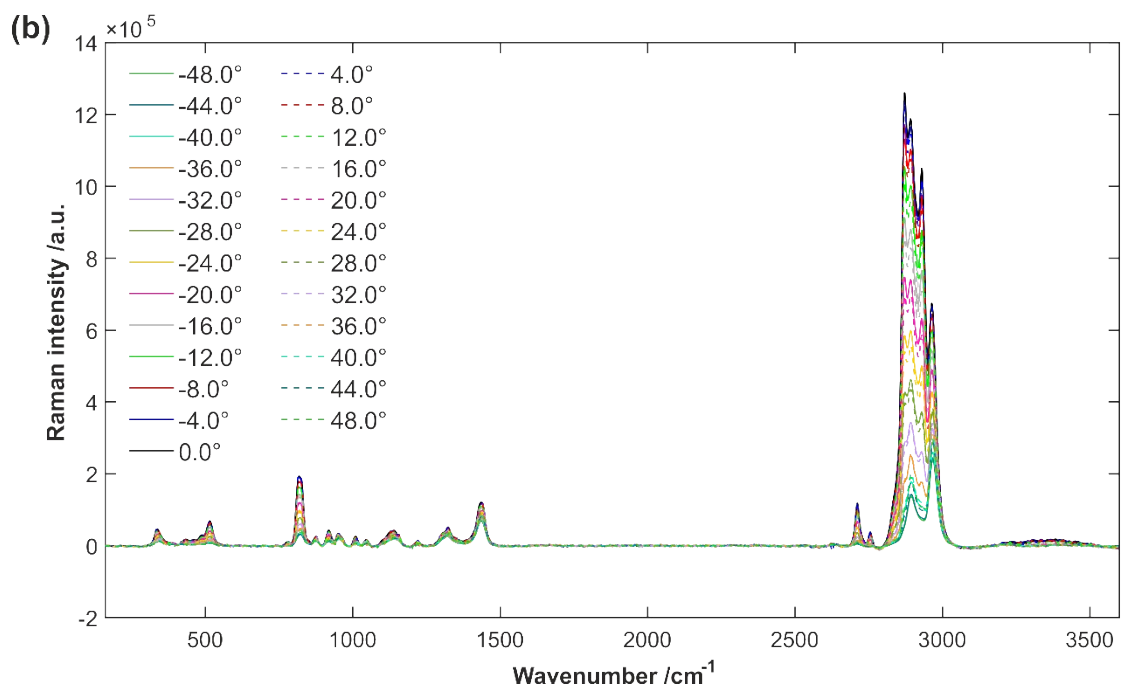

**Fig. S2 Retarder-resolved Raman spectra of (2R)-(-)-4-methylpentan-2-ol (a) and (2R2S)-(+)-4-methylpentan-2-ol in the range  $-48.0^\circ \leq \theta \leq 48.0^\circ$  in steps of  $4.0^\circ$ .**

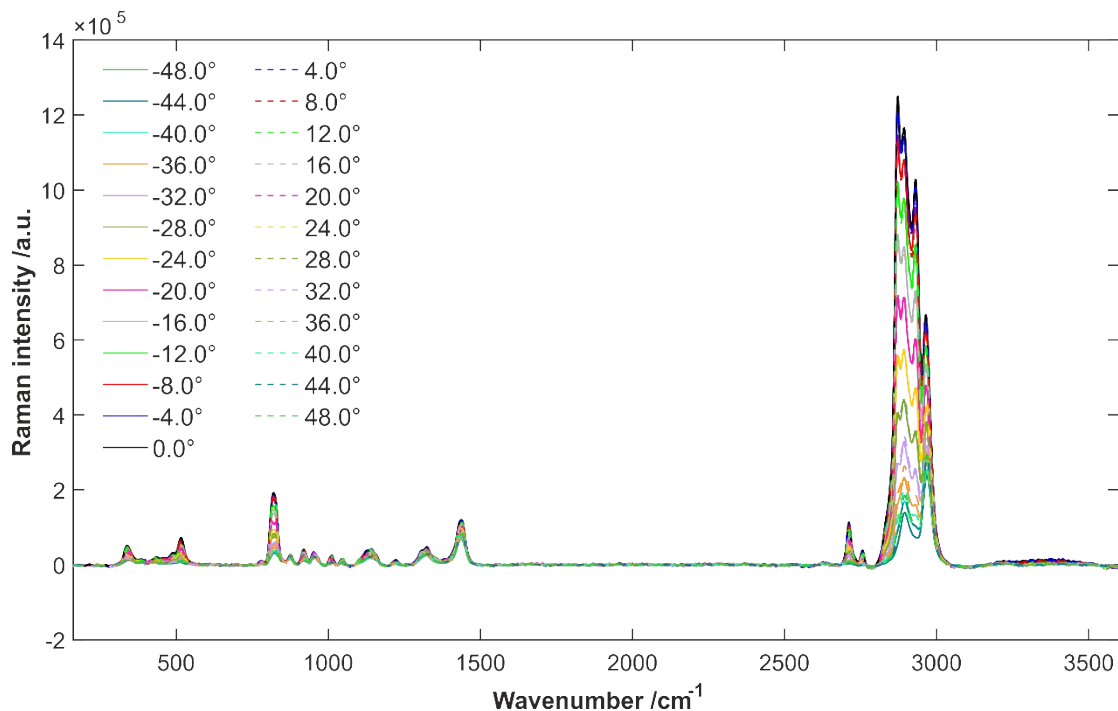

**Fig. S3 Retarder-resolved Raman spectra of (2S)-(+)-4-methylpentan-2-ol in the range  $-48.0^\circ \leq \theta \leq 48.0^\circ$  in steps of  $4.0^\circ$ .**

The parameters in Tab. S2 are obtained using the esR spectra of (2R2S)-( $\pm$ )-4-methylpentan-2-ol in Fig. S2 (b). The relative Raman intensities  $\Delta I_{rel}^B$  of a medium B are calculated according to eq. (S1)-(S3) with one simplification. The depolarization ratio of a vibrational band is assumed to be equal for all three media, i.e. is independent of the optical rotation  $\alpha$ . For a more accurate analysis, the depolarization ratio has to be calculated dependent on  $\alpha$ .<sup>4</sup>

**Tab. S2 Parameters for calculation of relative Raman intensity differences according to eq. (S1)-(S3).**

| Wavenumber /cm <sup>-1</sup> | Depolarization ratio | Amplitude $A$ | Minimum Intensity $I_{min}$ | $b_{rac} /^\circ$ | $b_{(-)} /^\circ$ | $b_{(+)} /^\circ$ |
|------------------------------|----------------------|---------------|-----------------------------|-------------------|-------------------|-------------------|
| 2894                         | 0.24                 | 0.880         | 0.120                       | 0.0               | 1.5               | -1.5              |
| 2964                         | 0.73                 | 0.362         | 0.208                       | 0.0               | 1.5               | -1.5              |

The retarder-resolved intensity for a vibrational band (vib) at the angle of the half-wave retarder  $\theta_i$  can be calculated according to eq. (S1) with the Amplitude  $A_{vib}$ , the minimum intensity  $I_{min,vib}$  and the shift  $b$  of the maximum intensity along  $\theta$  ( $b=-\alpha$ ).

$$I_{vib}(\theta_i) = A_{vib} \cos^2(2\theta_i + b) + I_{min,vib} \quad (S1)$$

Normalizing the intensity of a vibrational band (vib1) with respect to the corresponding intensity of a vibrational band (vib2) with different symmetry delivers

$$I_{norm,vib2}^B(\theta_i) = I_{vib1}^B(\theta_i)/I_{vib2}^B(\theta_i) \quad (S2)$$

In a last step, the difference of the normalized intensity and a reference medium  $I_{norm,vib2}^{ref}(\theta_i)$ , e.g. the racemate, is calculated relatively to the reference medium

$$\Delta I_{rel}^B(\theta_i) = \frac{I_{norm,vib2}^B(\theta_i) - I_{norm,vib2}^{ref}(\theta_i)}{I_{norm,vib2}^{ref}(\theta_i)} \quad (S3)$$

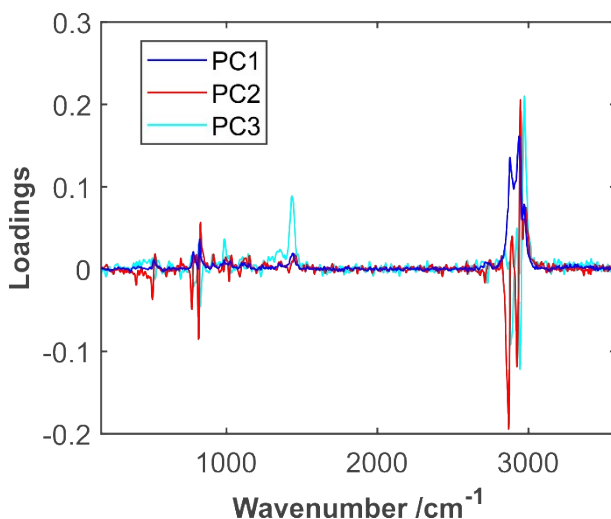

**Fig. S4** Loadings of the first three components of the difference Raman spectra of the pure enantiomers of butan-2-ol. PCA conducted with spectra taken from the half-wave retarder angular range  $-46^\circ \leq \theta \leq 46^\circ$ .

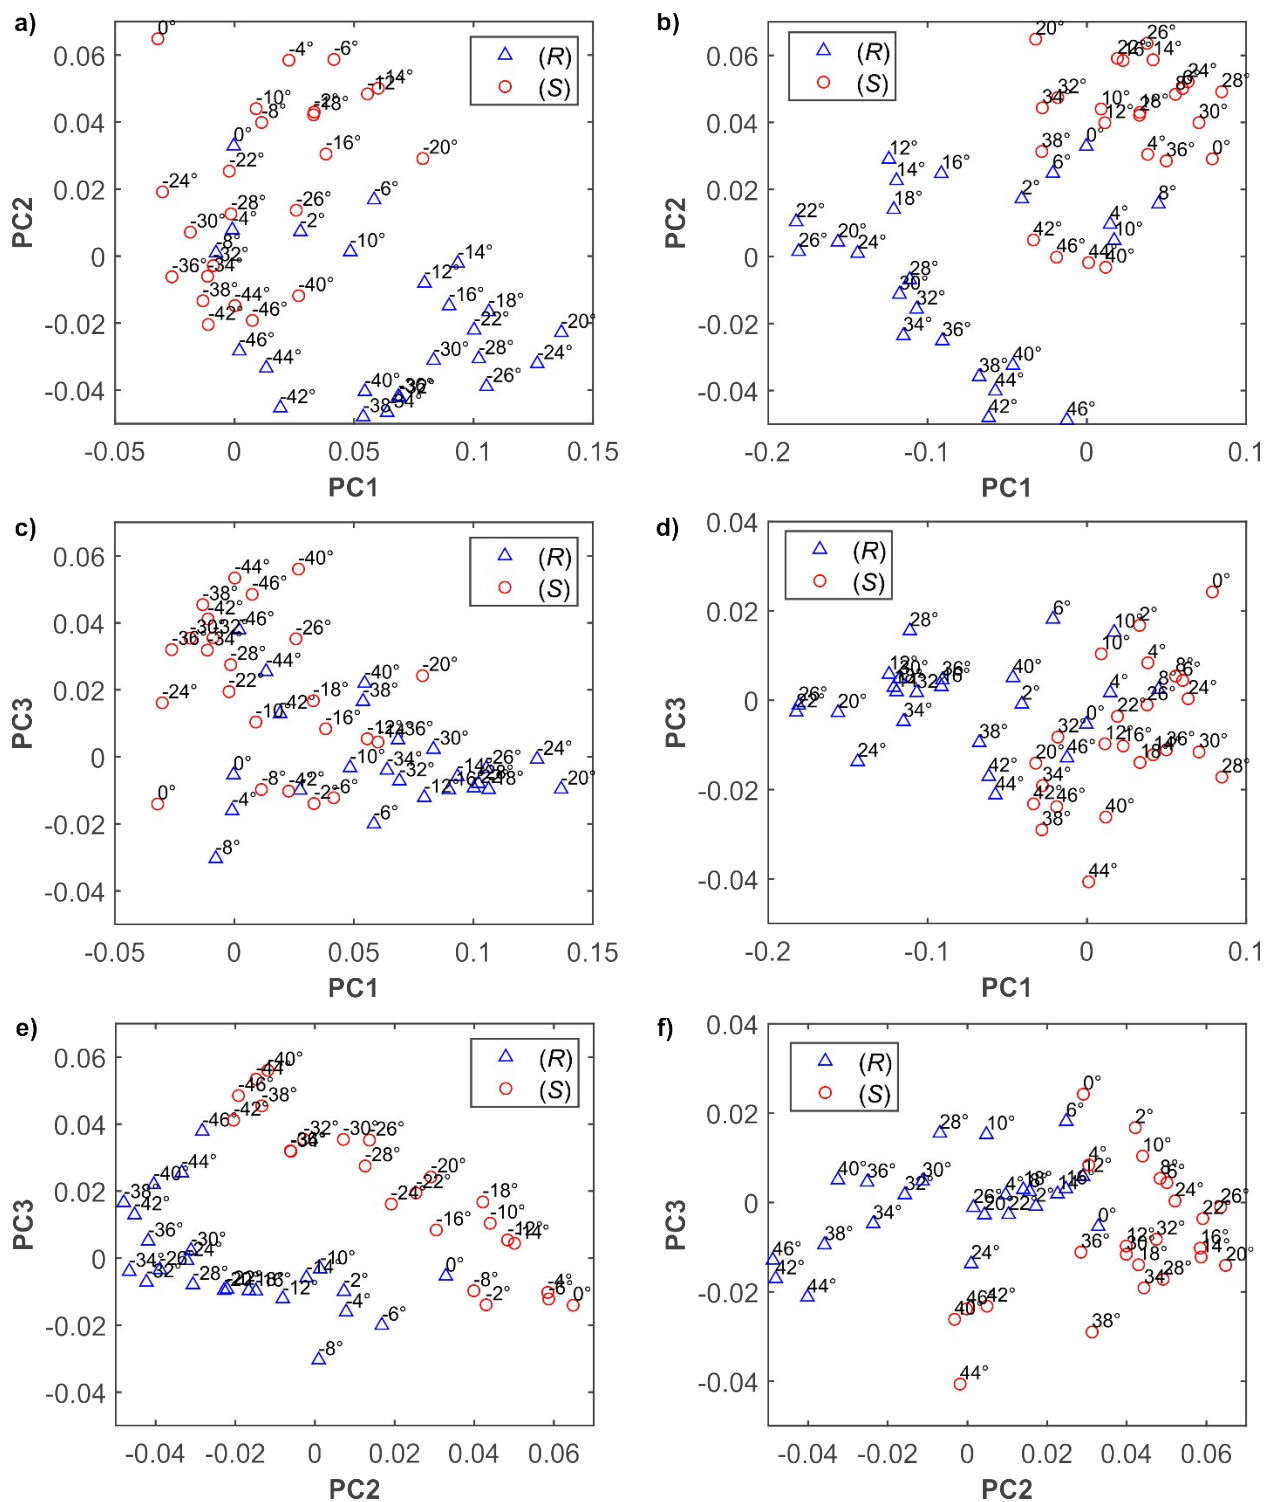

**Fig.S5** Principal component analysis (scores) of difference spectra of the pure enantiomers of butan-2-ol with the explained variances of 57.2%, (PC1), 12.4% (PC2), and 5.2% (PC3). For clarity, the results of the analysis are split up into two angular ranges:  $-46^\circ \leq \theta \leq 0^\circ$  in the left panel (a, c, e) and  $0^\circ \leq \theta \leq 46^\circ$  in the right panel (b, d, f). EsR spectra are taken from previous measurements according to Ref.<sup>5</sup>.

## **References**

1. J. Kiefer, S. Wagenfeld and D. Kerlé, *Spectrochim. Acta, Part A*, 2018, **189**, 57-65.
2. P. Larkin, *Infrared and Raman Spectroscopy: Principles and Spectral Interpretation*, Elsevier, Oxford, 2011.
3. G. Socrates, *Infrared and Raman Characteristic Group Frequencies: Tables and Charts*, John Wiley & Sons Ltd, Chichester, third edn., 2001.
4. J. Kiefer and M. Kaspereit, *Anal. Methods*, 2013, **5**, 797-800.
5. C. C. Rullich and J. Kiefer, *Analyst*, 2018, **143**, 3040-3048.
